# Supplementary material for: A peculiar layered 12-fold cationic coordination compound LiInTi2O6: phase relations, crystal structure and color-tunable photoluminescence
Source: Royal Society of Chemistry journal article supplement (doi:10.1039/c7ra01891f), 2017-01-01
Supplement: c7ra01891f1.pdf [file c7ra01891f1.pdf]

## Supporting Information

### A Peculiar Layered 12-fold Cationic Coordination Compound

### LiInTi<sub>2</sub>O<sub>6</sub>: Phase Relations, Crystal Structure and Color-tunable Photoluminescence

Liumei Su, Xing Fan, Gemei Cai\*, and Zhanpeng Jin\*

School of Materials Science and Engineering, Central South University, Changsha, 410083, Hunan, P. R. China

Education Ministry Key Laboratory of Non-ferrous Materials Science and Engineering, Central South University, Changsha, 410083, Hunan, P. R. China

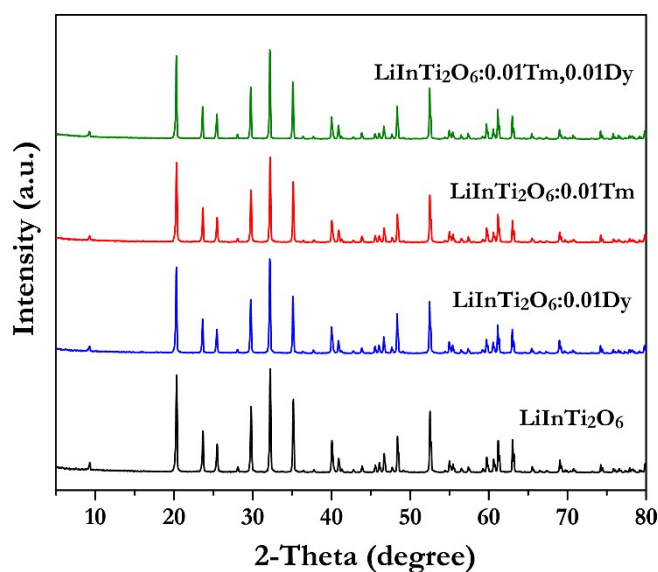

**Figure S1.** XRD patterns of the representative phosphors of LiInTi<sub>2</sub>O<sub>6</sub>:0.01Dy<sup>3+</sup>, LiInTi<sub>2</sub>O<sub>6</sub>:0.01Tm<sup>3+</sup>, and LiInTi<sub>2</sub>O<sub>6</sub>:0.01Tm<sup>3+</sup>,0.01Dy<sup>3+</sup>. The XRD pattern of pure LiInTi<sub>2</sub>O<sub>6</sub> is also given as a reference.

---

\* Corresponding Author. E-mail: caigemei@csu.edu.cn (Ge Mei Cai), jin@csu.edu.cn (Zhan Peng Jin). Tel.: +86-731-88877732; Fax: +86-731-88877732.

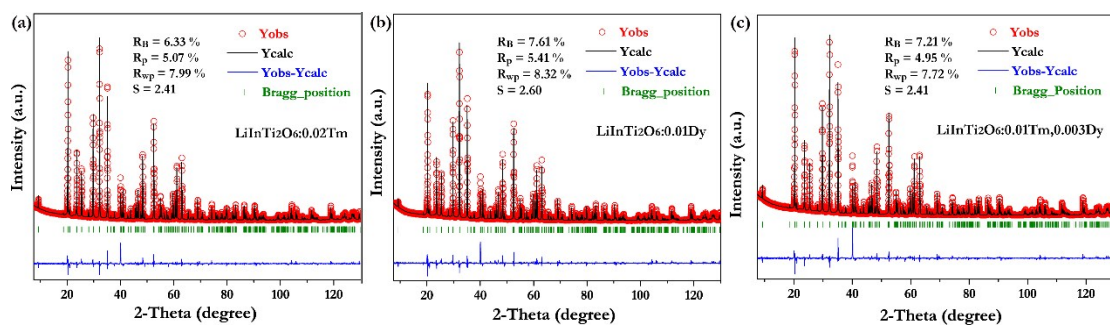

**Figure S2.** Rietveld refinement patterns for the representative phosphors of  $\text{LiInTi}_2\text{O}_6:0.02\text{Tm}^{3+}$ ,  $\text{LiInTi}_2\text{O}_6:0.01\text{Dy}^{3+}$ , and  $\text{LiInTi}_2\text{O}_6:0.01\text{Tm}^{3+}, 0.003\text{Dy}^{3+}$ .
